# Supplementary material for: Origin of non-conservative circular dichroism of the CP29 antenna complex of photosystem II
Source: Royal Society of Chemistry journal article supplement (doi:10.1039/c6cp08778g), 2017-01-01
Supplement: c6cp08778g1.dat [file c6cp08778g1.dat]

Excitonic Couplings (HF/CIS) for CP29. 
Pigments appear according to the .pdb file 3PL9.pdb and for every chlorophyll and carotenoid 4 transitions are taken into account. 
Example: The numbers 1,2,3,4 correspond to Chla 602 transitions Qy, By, Bx, Nx+xy respectively.

1  2    0.000000 
1  3    0.000000 
1  4    0.000000 
1  5    14.000000 
1  6    38.846071 
1  7    -48.809670 
1  8    26.910787 
1  9    6.000000 
1  10    8.739782 
1  11    1.121074 
1  12    -5.301300 
1  13    5.000000 
1  14    6.733130 
1  15    0.851144 
1  16    6.087637 
1  17    6.000000 
1  18    7.508522 
1  19    1.727759 
1  20    6.519600 
1  21    -7.000000 
1  22    -8.351570 
1  23    -8.348328 
1  24    -7.479938 
1  25    -26.000000 
1  26    -35.770202 
1  27    -21.953400 
1  28    14.947046 
1  29    -4.000000 
1  30    -12.237280 
1  31    18.011595 
1  32    -3.100617 
1  33    0.000000 
1  34    0.612604 
1  35    0.174333 
1  36    -1.691881 
1  37    7.000000 
1  38    10.947074 
1  39    5.293239 
1  40    -5.244254 
1  41    -1.000000 
1  42    -2.138018 
1  43    7.783976 
1  44    -2.919924 
1  45    0.000000 
1  46    -0.374326 
1  47    1.684202 
1  48    0.974049 
1  49    34.000000 
1  50    56.048856 
1  51    30.693810 
1  52    -22.870320 
1  53    -0.480677 
1  54    -0.472095 
1  55    -0.316725 
1  56    -0.189934 
1  57    11.739700 
1  58    14.035900 
1  59    7.955290 
1  60    5.669240 
1  61    -3.266120 
1  62    -3.228990 
1  63    -2.655670 
1  64    -1.389010 
2  3    0.000000 
2  4    0.000000 
2  5    25.960556 
2  6    62.297623 
2  7    -80.638392 
2  8    48.272722 
2  9    7.630619 
2  10    12.634387 
2  11    -0.985049 
2  12    -6.550749 
2  13    6.017903 
2  14    9.902447 
2  15    0.567512 
2  16    8.300100 
2  17    6.990930 
2  18    10.356055 
2  19    3.627610 
2  20    10.392052 
2  21    -11.087791 
2  22    -12.959298 
2  23    -10.436028 
2  24    -10.246525 
2  25    -42.135962 
2  26    -54.341389 
2  27    -37.161201 
2  28    24.046857 
2  29    -12.042239 
2  30    -24.622023 
2  31    21.730055 
2  32    -0.380078 
2  33    5.963851 
2  34    13.657405 
2  35    -9.388593 
2  36    -2.158448 
2  37    11.136131 
2  38    18.566878 
2  39    -2.123162 
2  40    -5.368148 
2  41    -7.428790 
2  42    -12.950857 
2  43    1.519945 
2  44    7.502297 
2  45    2.906971 
2  46    3.694938 
2  47    1.129226 
2  48    2.921074 
2  49    71.343866 
2  50    90.717454 
2  51    72.051712 
2  52    -45.343126 
2  53    -9.862848 
2  54    -9.686787 
2  55    -6.498783 
2  56    -3.897192 
2  57    37.930987 
2  58    45.350118 
2  59    25.703524 
2  60    18.317304 
2  61    -3.715512 
2  62    -3.673278 
2  63    -3.021069 
2  64    -1.580122 
3  4    0.000000 
3  5    32.497290 
3  6    41.257553 
3  7    36.468605 
3  8    -24.508250 
3  9    6.081390 
3  10    7.793868 
3  11    10.798028 
3  12    -9.168390 
3  13    3.176014 
3  14    4.132010 
3  15    5.173794 
3  16    8.629760 
3  17    4.924941 
3  18    10.008696 
3  19    -5.159666 
3  20    0.183925 
3  21    -1.110223 
3  22    2.956661 
3  23    -12.832767 
3  24    -5.377523 
3  25    -4.214490 
3  26    -9.844007 
3  27    19.245130 
3  28    -4.853960 
3  29    15.815100 
3  30    18.504024 
3  31    37.636043 
3  32    -21.296832 
3  33    -16.590420 
3  34    -36.542797 
3  35    35.959912 
3  36    -4.528506 
3  37    6.164644 
3  38    -0.152747 
3  39    40.020309 
3  40    -13.830173 
3  41    23.089395 
3  42    30.524669 
3  43    47.436055 
3  44    -43.688161 
3  45    -8.143625 
3  46    -16.055633 
3  47    4.835812 
3  48    -5.709355 
3  49    -8.569260 
3  50    -2.064169 
3  51    -80.825708 
3  52    30.602436 
3  53    35.107380 
3  54    34.480530 
3  55    23.132760 
3  56    13.872285 
3  57    -92.441265 
3  58    -110.521950 
3  59    -62.641950 
3  60    -44.640960 
3  61    -7.134477 
3  62    -7.053386 
3  63    -5.801009 
3  64    -3.034133 
4  5    -62.009010 
4  6    -94.961224 
4  7    -21.919313 
4  8    -7.426828 
4  9    -6.558300 
4  10    -9.860419 
4  11    -4.438072 
4  12    7.696702 
4  13    -4.090262 
4  14    -12.157799 
4  15    -5.757570 
4  16    -8.824068 
4  17    -5.870708 
4  18    -19.880963 
4  19    2.083883 
4  20    -5.460187 
4  21    3.300705 
4  22    2.900125 
4  23    20.203706 
4  24    5.988866 
4  25    21.070665 
4  26    29.090094 
4  27    -2.349370 
4  28    -4.916991 
4  29    -3.673467 
4  30    -0.485258 
4  31    -25.756093 
4  32    9.833726 
4  33    4.408173 
4  34    9.183840 
4  35    -9.325840 
4  36    1.882573 
4  37    -6.025226 
4  38    -6.470012 
4  39    -13.958683 
4  40    7.351322 
4  41    -5.624840 
4  42    -5.958550 
4  43    -18.686939 
4  44    12.509150 
4  45    2.009942 
4  46    9.064393 
4  47    -4.827158 
4  48    0.997116 
4  49    -12.012525 
4  50    -18.038277 
4  51    10.586456 
4  52    -0.206266 
4  53    -9.622821 
4  54    -9.451010 
4  55    -6.340625 
4  56    -3.802339 
4  57    -12.131328 
4  58    -14.504160 
4  59    -8.220675 
4  60    -5.858361 
4  61    5.339273 
4  62    5.278585 
4  63    4.341343 
4  64    2.270675 
5  6    0.000000 
5  7    0.000000 
5  8    0.000000 
5  9    0.000000 
5  10    0.070547 
5  11    2.668281 
5  12    -1.619651 
5  13    -3.000000 
5  14    -5.628086 
5  15    7.668501 
5  16    8.258888 
5  17    5.000000 
5  18    16.290800 
5  19    -17.439326 
5  20    -6.375356 
5  21    4.000000 
5  22    7.468350 
5  23    -0.355560 
5  24    2.658844 
5  25    81.000000 
5  26    116.156920 
5  27    153.198150 
5  28    -75.320467 
5  29    6.000000 
5  30    10.570362 
5  31    4.662252 
5  32    -5.082824 
5  33    -1.000000 
5  34    -3.171688 
5  35    7.160213 
5  36    -1.814715 
5  37    1.000000 
5  38    -0.422728 
5  39    8.463336 
5  40    -3.953052 
5  41    2.000000 
5  42    -1.766196 
5  43    24.696420 
5  44    -9.467399 
5  45    -4.000000 
5  46    -5.558887 
5  47    -0.554317 
5  48    -3.049725 
5  49    -2.000000 
5  50    -0.470618 
5  51    -8.578983 
5  52    3.724491 
5  53    11.809500 
5  54    11.598600 
5  55    7.781460 
5  56    4.666380 
5  57    -24.524000 
5  58    -29.320800 
5  59    -16.618400 
5  60    -11.842900 
5  61    -1.766280 
5  62    -1.746200 
5  63    -1.436150 
5  64    -0.751159 
6  7    0.000000 
6  8    0.000000 
6  9    -6.932763 
6  10    -12.404029 
6  11    6.900063 
6  12    2.180160 
6  13    -10.683404 
6  14    -20.745132 
6  15    8.234612 
6  16    -8.468540 
6  17    -4.149025 
6  18    2.659050 
6  19    -32.532889 
6  20    -50.873759 
6  21    6.856542 
6  22    9.394991 
6  23    5.087567 
6  24    6.293263 
6  25    167.590335 
6  26    207.315465 
6  27    118.239025 
6  28    -82.489979 
6  29    10.096972 
6  30    16.974127 
6  31    0.194259 
6  32    -5.821870 
6  33    -0.976037 
6  34    -4.620087 
6  35    10.703922 
6  36    -2.658052 
6  37    -0.014973 
6  38    -2.818799 
6  39    12.167122 
6  40    -4.745183 
6  41    4.072477 
6  42    -2.371563 
6  43    38.717962 
6  44    -15.113816 
6  45    -5.849201 
6  46    -8.503707 
6  47    -1.646418 
6  48    -5.117565 
6  49    -3.185975 
6  50    -1.708891 
6  51    -13.090360 
6  52    5.900394 
6  53    19.268574 
6  54    18.924494 
6  55    12.696365 
6  56    7.613752 
6  57    -68.524748 
6  58    -81.927785 
6  59    -46.435092 
6  60    -33.091427 
6  61    1.881089 
6  62    1.859706 
6  63    1.529501 
6  64    0.799984 
7  8    0.000000 
7  9    29.509200 
7  10    47.184181 
7  11    -5.832820 
7  12    -19.971373 
7  13    23.888910 
7  14    38.525305 
7  15    17.243947 
7  16    72.878991 
7  17    56.340818 
7  18    93.540668 
7  19    7.804523 
7  20    106.859813 
7  21    -0.262631 
7  22    6.880991 
7  23    -22.659073 
7  24    -9.459804 
7  25    7.760613 
7  26    -67.242119 
7  27    280.889438 
7  28    -76.901600 
7  29    4.896402 
7  30    -0.238756 
7  31    32.723082 
7  32    -10.678897 
7  33    -2.623687 
7  34    -4.639191 
7  35    2.809126 
7  36    -0.275375 
7  37    7.615482 
7  38    10.729644 
7  39    8.229788 
7  40    -8.523201 
7  41    0.190215 
7  42    -0.221478 
7  43    3.771289 
7  44    -0.911396 
7  45    0.450677 
7  46    -2.117285 
7  47    5.348572 
7  48    1.832587 
7  49    0.895394 
7  50    1.591054 
7  51    -3.339715 
7  52    0.913345 
7  53    1.290587 
7  54    1.267539 
7  55    0.850387 
7  56    0.509960 
7  57    164.160150 
7  58    196.269150 
7  59    111.241200 
7  60    79.274895 
7  61    -17.871315 
7  62    -17.668140 
7  63    -14.531055 
7  64    -7.600268 
8  9    -7.702590 
8  10    -11.861353 
8  11    -0.160147 
8  12    5.136484 
8  13    -4.766947 
8  14    -10.177417 
8  15    -21.515287 
8  16    -20.845638 
8  17    -19.880550 
8  18    -71.322209 
8  19    23.865778 
8  20    -5.082601 
8  21    -2.782881 
8  22    -11.845375 
8  23    9.877042 
8  24    0.396143 
8  25    -38.267250 
8  26    -29.302870 
8  27    -106.046963 
8  28    41.545953 
8  29    -4.598580 
8  30    -5.239860 
8  31    -11.014897 
8  32    5.815735 
8  33    0.691468 
8  34    2.424018 
8  35    -5.032821 
8  36    1.409833 
8  37    -3.713315 
8  38    -4.256361 
8  39    -8.345228 
8  40    6.149061 
8  41    -0.531556 
8  42    3.846350 
8  43    -20.234048 
8  44    5.671437 
8  45    1.620030 
8  46    7.833629 
8  47    -4.686098 
8  48    0.731644 
8  49    -0.953196 
8  50    -2.081276 
8  51    3.880678 
8  52    -1.186951 
8  53    -9.616802 
8  54    -9.445096 
8  55    -6.336655 
8  56    -3.799963 
8  57    -28.161725 
8  58    -33.670032 
8  59    -19.083504 
8  60    -13.599590 
8  61    5.654542 
8  62    5.590263 
8  63    4.597687 
8  64    2.404744 
9  10    0.000000 
9  11    0.000000 
9  12    0.000000 
9  13    67.000000 
9  14    133.216488 
9  15    70.468772 
9  16    119.401500 
9  17    24.000000 
9  18    30.914354 
9  19    48.204619 
9  20    55.053187 
9  21    -4.000000 
9  22    -1.229439 
9  23    -21.733138 
9  24    -12.632531 
9  25    -5.000000 
9  26    -17.749572 
9  27    45.113250 
9  28    -9.092519 
9  29    -1.000000 
9  30    -8.149432 
9  31    31.126305 
9  32    -6.256188 
9  33    -3.000000 
9  34    -6.170748 
9  35    -0.458802 
9  36    1.753330 
9  37    2.000000 
9  38    5.721387 
9  39    2.433385 
9  40    -3.237020 
9  41    2.000000 
9  42    2.095251 
9  43    10.098900 
9  44    -5.512954 
9  45    -2.000000 
9  46    -3.097168 
9  47    -1.468044 
9  48    -2.926837 
9  49    -3.000000 
9  50    -4.826769 
9  51    -3.253215 
9  52    2.264666 
9  53    -8.595090 
9  54    -8.441630 
9  55    -5.663430 
9  56    -3.396250 
9  57    68.918700 
9  58    82.398800 
9  59    46.702100 
9  60    33.281700 
9  61    -51.249900 
9  62    -50.667400 
9  63    -41.671100 
9  64    -21.795400 
10  11    0.000000 
10  12    0.000000 
10  13    100.467620 
10  14    181.584003 
10  15    110.447927 
10  16    169.063661 
10  17    37.908266 
10  18    43.365595 
10  19    80.427457 
10  20    85.989203 
10  21    -7.104252 
10  22    -1.340004 
10  23    -32.457738 
10  24    -18.340843 
10  25    -1.693911 
10  26    -26.025503 
10  27    73.759565 
10  28    -16.215216 
10  29    -2.008324 
10  30    -16.378605 
10  31    43.633093 
10  32    -5.877991 
10  33    -4.871247 
10  34    -7.461222 
10  35    -0.792471 
10  36    2.309633 
10  37    -1.949148 
10  38    -2.853951 
10  39    2.998588 
10  40    1.585177 
10  41    1.887522 
10  42    0.090434 
10  43    15.977490 
10  44    -8.239885 
10  45    -3.997050 
10  46    -4.213330 
10  47    -5.347853 
10  48    -5.878281 
10  49    -5.018781 
10  50    -6.746823 
10  51    -4.123321 
10  52    2.948356 
10  53    -7.037521 
10  54    -6.911866 
10  55    -4.637133 
10  56    -2.780793 
10  57    110.206580 
10  58    131.762070 
10  59    74.680414 
10  60    53.220013 
10  61    -80.580825 
10  62    -79.664899 
10  63    -65.519938 
10  64    -34.269153 
11  12    0.000000 
11  13    8.071720 
11  14    106.439844 
11  15    -215.510810 
11  16    -19.099533 
11  17    7.702641 
11  18    27.854797 
11  19    -39.325908 
11  20    -1.273456 
11  21    -5.473428 
11  22    -1.418615 
11  23    -22.162530 
11  24    -14.651438 
11  25    -11.907525 
11  26    -14.233608 
11  27    -21.156644 
11  28    13.047028 
11  29    13.504470 
11  30    8.457501 
11  31    61.257105 
11  32    -24.797425 
11  33    -9.134590 
11  34    -13.584867 
11  35    -1.265163 
11  36    3.462361 
11  37    33.544455 
11  38    52.602361 
11  39    3.664192 
11  40    -27.500347 
11  41    10.939845 
11  42    16.806480 
11  43    2.872608 
11  44    -4.906263 
11  45    1.742839 
11  46    -3.165667 
11  47    12.138475 
11  48    4.694445 
11  49    -4.848669 
11  50    -6.679101 
11  51    -5.594272 
11  52    3.728839 
11  53    -44.532180 
11  54    -43.737120 
11  55    -29.342880 
11  56    -17.596320 
11  57    -19.704195 
11  58    -23.558220 
11  59    -13.352325 
11  60    -9.515384 
11  61    -27.776805 
11  62    -27.461070 
11  63    -22.585185 
11  64    -11.812815 
12  13    -7.393932 
12  14    -41.582021 
12  15    142.228997 
12  16    15.861424 
12  17    -9.271943 
12  18    -36.925897 
12  19    30.081122 
12  20    -14.771394 
12  21    8.851771 
12  22    11.021616 
12  23    51.037284 
12  24    16.994736 
12  25    12.584670 
12  26    28.448211 
12  27    -16.737336 
12  28    -4.338894 
12  29    -4.927230 
12  30    5.803159 
12  31    -51.192963 
12  32    13.264208 
12  33    6.101560 
12  34    9.251326 
12  35    0.791403 
12  36    -2.490679 
12  37    -10.144974 
12  38    -15.971733 
12  39    -3.884470 
12  40    8.585042 
12  41    -5.468705 
12  42    -7.355220 
12  43    -7.851901 
12  44    5.904277 
12  45    0.820688 
12  46    5.414842 
12  47    -4.886024 
12  48    0.446708 
12  49    4.648843 
12  50    6.331189 
12  51    4.591308 
12  52    -3.124734 
12  53    17.570150 
12  54    17.256413 
12  55    11.577245 
12  56    6.942640 
12  57    -36.237062 
12  58    -43.324829 
12  59    -24.555696 
12  60    -17.499293 
12  61    21.613574 
12  62    21.367949 
12  63    17.573952 
12  64    9.191762 
13  14    0.000000 
13  15    0.000000 
13  16    0.000000 
13  17    20.000000 
13  18    -6.196980 
13  19    52.838355 
13  20    57.489000 
13  21    -4.000000 
13  22    -2.705700 
13  23    -16.553812 
13  24    -10.228669 
13  25    2.000000 
13  26    -9.342763 
13  27    81.510135 
13  28    -23.329997 
13  29    -1.000000 
13  30    -5.458811 
13  31    14.600670 
13  32    -2.477365 
13  33    -2.000000 
13  34    -3.276698 
13  35    0.682390 
13  36    0.551007 
13  37    2.000000 
13  38    1.524200 
13  39    2.947277 
13  40    -2.110923 
13  41    1.000000 
13  42    0.117760 
13  43    4.436723 
13  44    -2.056539 
13  45    -1.000000 
13  46    -1.927087 
13  47    0.277834 
13  48    -0.992520 
13  49    -2.000000 
13  50    -2.658270 
13  51    -2.363603 
13  52    1.521348 
13  53    0.093642 
13  54    0.091970 
13  55    0.061702 
13  56    0.037002 
13  57    30.090700 
13  58    35.976300 
13  59    20.390700 
13  60    14.531200 
13  61    -28.774500 
13  62    -28.447400 
13  63    -23.396400 
13  64    -12.237100 
14  15    0.000000 
14  16    0.000000 
14  17    49.223901 
14  18    71.626154 
14  19    97.661090 
14  20    135.909636 
14  21    -3.724365 
14  22    3.374701 
14  23    -32.638134 
14  24    -18.505951 
14  25    14.769708 
14  26    -12.841312 
14  27    136.508964 
14  28    -40.212314 
14  29    -2.854899 
14  30    -12.672464 
14  31    26.896007 
14  32    -3.726112 
14  33    -3.868292 
14  34    -5.872983 
14  35    -0.627226 
14  36    1.705830 
14  37    2.689008 
14  38    4.205937 
14  39    2.085180 
14  40    -1.972771 
14  41    2.718541 
14  42    2.841364 
14  43    7.509619 
14  44    -4.366504 
14  45    -1.326432 
14  46    -2.464832 
14  47    0.450418 
14  48    -1.264756 
14  49    -3.741527 
14  50    -5.099669 
14  51    -3.061377 
14  52    2.286735 
14  53    -6.499105 
14  54    -6.383068 
14  55    -4.282362 
14  56    -2.568047 
14  57    47.582122 
14  58    56.888907 
14  59    32.243590 
14  60    22.977981 
14  61    -70.015150 
14  62    -69.219330 
14  63    -56.929017 
14  64    -29.775820 
15  16    0.000000 
15  17    40.361459 
15  18    -73.030136 
15  19    281.269198 
15  20    16.554630 
15  21    -14.075650 
15  22    -25.830466 
15  23    16.328596 
15  24    4.088261 
15  25    -9.478949 
15  26    -12.002782 
15  27    -7.593691 
15  28    6.108714 
15  29    6.697383 
15  30    11.520404 
15  31    -4.136700 
15  32    -2.591839 
15  33    1.015107 
15  34    0.264283 
15  35    4.616820 
15  36    -1.866307 
15  37    -0.289122 
15  38    -1.844849 
15  39    7.596546 
15  40    -5.140752 
15  41    -3.443990 
15  42    -5.492039 
15  43    1.321627 
15  44    1.498663 
15  45    -1.028576 
15  46    -2.253873 
15  47    0.847648 
15  48    -0.709662 
15  49    0.482309 
15  50    1.384675 
15  51    -2.769328 
15  52    0.925656 
15  53    15.629783 
15  54    15.350732 
15  55    10.298668 
15  56    6.175920 
15  57    27.663725 
15  58    33.074625 
15  59    18.746028 
15  60    13.359161 
15  61    61.476706 
15  62    60.777947 
15  63    49.986485 
15  64    26.144658 
16  17    31.436472 
16  18    93.555365 
16  19    167.619974 
16  20    275.831016 
16  21    -7.088897 
16  22    -19.309269 
16  23    -3.021469 
16  24    -6.580336 
16  25    -1.935780 
16  26    -20.314145 
16  27    46.088761 
16  28    -8.187894 
16  29    2.425647 
16  30    1.482746 
16  31    7.901627 
16  32    -5.333863 
16  33    -1.257585 
16  34    -2.331388 
16  35    1.694670 
16  36    -0.156289 
16  37    1.131942 
16  38    1.090731 
16  39    4.007414 
16  40    -5.580788 
16  41    0.221398 
16  42    -0.542144 
16  43    4.277221 
16  44    -3.013045 
16  45    -0.924194 
16  46    -3.604386 
16  47    1.166593 
16  48    -1.382326 
16  49    -1.391082 
16  50    -1.478763 
16  51    -2.480126 
16  52    2.521946 
16  53    7.904531 
16  54    7.763400 
16  55    5.208413 
16  56    3.123375 
16  57    100.965563 
16  58    120.713813 
16  59    68.418375 
16  60    48.757500 
16  61    20.319938 
16  62    20.088938 
16  63    16.522050 
16  64    8.641613 
17  18    0.000000 
17  19    0.000000 
17  20    0.000000 
17  21    -3.000000 
17  22    -1.808761 
17  23    -6.654305 
17  24    -4.491656 
17  25    -6.000000 
17  26    -12.060846 
17  27    39.530505 
17  28    -9.614067 
17  29    1.000000 
17  30    -2.197512 
17  31    8.952804 
17  32    -2.082305 
17  33    -2.000000 
17  34    -3.532075 
17  35    0.852256 
17  36    0.602785 
17  37    2.000000 
17  38    2.157587 
17  39    2.783634 
17  40    -2.071925 
17  41    2.000000 
17  42    1.379116 
17  43    9.945716 
17  44    -4.281130 
17  45    -1.000000 
17  46    -2.517305 
17  47    0.814225 
17  48    -0.936446 
17  49    -2.000000 
17  50    -2.756427 
17  51    -2.730924 
17  52    1.698745 
17  53    0.984871 
17  54    0.967286 
17  55    0.648946 
17  56    0.389160 
17  57    32.533700 
17  58    38.897100 
17  59    22.046100 
17  60    15.710900 
17  61    -7.191020 
17  62    -7.109280 
17  63    -5.846990 
17  64    -3.058180 
18  19    0.000000 
18  20    0.000000 
18  21    -5.813979 
18  22    -6.211877 
18  23    -8.344456 
18  24    -7.163381 
18  25    -9.263125 
18  26    -29.234153 
18  27    42.175265 
18  28    -0.540854 
18  29    1.714226 
18  30    -0.657897 
18  31    12.787146 
18  32    -3.832969 
18  33    -2.883420 
18  34    -5.303074 
18  35    2.782237 
18  36    0.314923 
18  37    2.329984 
18  38    2.689202 
18  39    6.191956 
18  40    -4.170604 
18  41    1.477503 
18  42    -1.313653 
18  43    16.133038 
18  44    -5.846972 
18  45    -2.572901 
18  46    -4.784469 
18  47    1.051529 
18  48    -2.007881 
18  49    -3.151122 
18  50    -3.695320 
18  51    -5.144777 
18  52    2.927511 
18  53    5.452399 
18  54    5.355051 
18  55    3.592666 
18  56    2.154447 
18  57    50.279995 
18  58    60.114517 
18  59    34.071723 
18  60    24.280773 
18  61    -6.439214 
18  62    -6.366021 
18  63    -5.235695 
18  64    -2.738454 
19  20    0.000000 
19  21    3.036607 
19  22    7.069151 
19  23    -8.276058 
19  24    -2.011709 
19  25    24.179820 
19  26    21.983622 
19  27    78.585935 
19  28    -42.312565 
19  29    -4.253718 
19  30    -8.487810 
19  31    6.463566 
19  32    0.967556 
19  33    -1.595444 
19  34    -1.233319 
19  35    -4.217568 
19  36    1.969106 
19  37    0.831470 
19  38    2.386636 
19  39    -5.021863 
19  40    2.372366 
19  41    7.621677 
19  42    11.732475 
19  43    -0.934340 
19  44    -3.339236 
19  45    1.554527 
19  46    2.449975 
19  47    0.472092 
19  48    1.453609 
19  49    -1.242307 
19  50    -2.340979 
19  51    2.134102 
19  52    -0.518390 
19  53    -11.995330 
19  54    -11.781191 
19  55    -7.903906 
19  56    -4.739810 
19  57    23.422807 
19  58    28.004141 
19  59    15.872192 
19  60    11.311149 
19  61    -16.748447 
19  62    -16.558047 
19  63    -13.618118 
19  64    -7.122732 
20  21    -2.045185 
20  22    -1.135124 
20  23    -15.819038 
20  24    -9.411082 
20  25    8.976691 
20  26    -14.173740 
20  27    88.781505 
20  28    -39.758202 
20  29    -1.399157 
20  30    -4.752324 
20  31    8.735888 
20  32    -1.872979 
20  33    -1.763948 
20  34    -2.265229 
20  35    -1.353560 
20  36    2.064665 
20  37    1.122450 
20  38    1.971525 
20  39    -0.661701 
20  40    -0.026856 
20  41    3.366605 
20  42    4.748548 
20  43    1.954585 
20  44    -4.631161 
20  45    0.134065 
20  46    0.038378 
20  47    0.904542 
20  48    0.390952 
20  49    -1.676168 
20  50    -2.375647 
20  51    -0.480504 
20  52    1.201228 
20  53    -8.827275 
20  54    -8.669663 
20  55    -5.816419 
20  56    -3.487988 
20  57    73.022438 
20  58    87.305250 
20  59    49.482937 
20  60    35.263312 
20  61    -18.155138 
20  62    -17.948775 
20  63    -14.761856 
20  64    -7.720969 
21  22    0.000000 
21  23    0.000000 
21  24    0.000000 
21  25    27.000000 
21  26    46.845090 
21  27    22.635900 
21  28    -19.610870 
21  29    38.000000 
21  30    77.680548 
21  31    -8.312755 
21  32    -15.382224 
21  33    5.000000 
21  34    8.172339 
21  35    2.477864 
21  36    -2.827451 
21  37    -1.000000 
21  38    -1.489277 
21  39    -1.258656 
21  40    0.109866 
21  41    -2.000000 
21  42    -2.754931 
21  43    -3.903260 
21  44    3.094186 
21  45    1.000000 
21  46    1.758481 
21  47    -0.913718 
21  48    0.524224 
21  49    5.000000 
21  50    8.537541 
21  51    3.555856 
21  52    -3.196354 
21  53    3.292410 
21  54    3.233620 
21  55    2.169420 
21  56    1.300960 
21  57    -5.079800 
21  58    -6.073380 
21  59    -3.442280 
21  60    -2.453100 
21  61    16.659100 
21  62    16.469700 
21  63    13.545400 
21  64    7.084740 
22  23    0.000000 
22  24    0.000000 
22  25    36.012733 
22  26    50.066240 
22  27    48.537576 
22  28    -31.581112 
22  29    57.813134 
22  30    77.501065 
22  31    17.103104 
22  32    -22.787512 
22  33    5.632576 
22  34    7.993239 
22  35    3.220896 
22  36    -3.165027 
22  37    1.927468 
22  38    2.677802 
22  39    -1.297117 
22  40    -0.790358 
22  41    -2.073676 
22  42    -2.500931 
22  43    -4.490591 
22  44    3.429166 
22  45    1.104990 
22  46    1.799058 
22  47    0.030944 
22  48    1.122673 
22  49    6.758722 
22  50    9.768116 
22  51    2.566560 
22  52    -3.076490 
22  53    -4.632734 
22  54    -4.550019 
22  55    -3.052576 
22  56    -1.830573 
22  57    -0.787597 
22  58    -0.941647 
22  59    -0.533707 
22  60    -0.380340 
22  61    11.085401 
22  62    10.959390 
22  63    9.013499 
22  64    4.714366 
23  24    0.000000 
23  25    33.229770 
23  26    62.243261 
23  27    -44.878693 
23  28    5.430010 
23  29    41.219745 
23  30    91.535408 
23  31    -102.857507 
23  32    9.140988 
23  33    7.896294 
23  34    11.262118 
23  35    0.564285 
23  36    -2.552594 
23  37    -9.456731 
23  38    -13.945895 
23  39    -2.881855 
23  40    3.692214 
23  41    -3.407891 
23  42    -4.436558 
23  43    -4.134725 
23  44    3.426714 
23  45    0.324487 
23  46    2.484257 
23  47    -3.859662 
23  48    -0.825501 
23  49    6.437561 
23  50    7.806295 
23  51    7.436651 
23  52    -4.542191 
23  53    23.555192 
23  54    23.134596 
23  55    15.520842 
23  56    9.307560 
23  57    -21.931025 
23  58    -26.220602 
23  59    -14.861384 
23  60    -10.590720 
23  61    62.234959 
23  62    61.527532 
23  63    50.602996 
23  64    26.467147 
24  25    17.404590 
24  26    28.682211 
24  27    -3.705372 
24  28    -9.468459 
24  29    27.950790 
24  30    45.009300 
24  31    -19.486669 
24  32    -8.609515 
24  33    3.718481 
24  34    5.156699 
24  35    1.198774 
24  36    -3.009679 
24  37    -2.606047 
24  38    -4.069473 
24  39    -0.450931 
24  40    1.237546 
24  41    -1.549370 
24  42    -1.989882 
24  43    -2.059756 
24  44    3.227915 
24  45    0.269158 
24  46    2.082157 
24  47    -2.493688 
24  48    -0.238449 
24  49    3.448053 
24  50    4.528040 
24  51    2.519756 
24  52    -3.687156 
24  53    14.703956 
24  54    14.441419 
24  55    9.688650 
24  56    5.810100 
24  57    -12.379969 
24  58    -14.801419 
24  59    -8.389162 
24  60    -5.978438 
24  61    74.284687 
24  62    73.440375 
24  63    60.400500 
24  64    31.591500 
25  26    0.000000 
25  27    0.000000 
25  28    0.000000 
25  29    -1.000000 
25  30    4.495807 
25  31    -20.949600 
25  32    4.383255 
25  33    4.000000 
25  34    8.420919 
25  35    -0.087782 
25  36    -2.023349 
25  37    -1.000000 
25  38    -1.498478 
25  39    -4.292306 
25  40    1.787565 
25  41    -3.000000 
25  42    -3.856314 
25  43    -7.963253 
25  44    5.368493 
25  45    1.000000 
25  46    2.802418 
25  47    -1.176642 
25  48    0.897666 
25  49    6.000000 
25  50    8.986566 
25  51    6.332183 
25  52    -4.361671 
25  53    -2.180260 
25  54    -2.141330 
25  55    -1.436610 
25  56    -0.861504 
25  57    -15.026900 
25  58    -17.966100 
25  59    -10.182800 
25  60    -7.256670 
25  61    6.481690 
25  62    6.408010 
25  63    5.270230 
25  64    2.756520 
26  27    0.000000 
26  28    0.000000 
26  29    -2.794350 
26  30    8.708907 
26  31    -40.883212 
26  32    8.858673 
26  33    8.288887 
26  34    13.024554 
26  35    -0.465963 
26  36    -2.944614 
26  37    -3.725386 
26  38    -5.001380 
26  39    -7.151715 
26  40    4.146349 
26  41    -5.044390 
26  42    -5.838328 
26  43    -11.763525 
26  44    7.784198 
26  45    1.862819 
26  46    4.392449 
26  47    -2.707482 
26  48    0.909116 
26  49    9.767010 
26  50    12.811680 
26  51    9.743525 
26  52    -6.517149 
26  53    -0.856465 
26  54    -0.841173 
26  55    -0.564338 
26  56    -0.338422 
26  57    -42.813557 
26  58    -51.187697 
26  59    -29.012208 
26  60    -20.675188 
26  61    21.749409 
26  62    21.502195 
26  63    17.684310 
26  64    9.249525 
27  28    0.000000 
27  29    6.788544 
27  30    3.399368 
27  31    28.156968 
27  32    -9.762308 
27  33    1.292949 
27  34    1.395332 
27  35    3.020222 
27  36    -1.721778 
27  37    5.881586 
27  38    8.583833 
27  39    3.215298 
27  40    -5.376571 
27  41    -1.389045 
27  42    -2.025115 
27  43    -1.190601 
27  44    2.015676 
27  45    0.633898 
27  46    -0.323633 
27  47    2.662025 
27  48    1.417606 
27  49    4.001634 
27  50    6.071397 
27  51    -0.724319 
27  52    -0.929862 
27  53    -5.162766 
27  54    -5.070587 
27  55    -3.401822 
27  56    -2.040003 
27  57    60.427815 
27  58    72.247140 
27  59    40.948320 
27  60    29.181285 
27  61    -40.299840 
27  62    -39.841725 
27  63    -32.767665 
27  64    -17.138625 
28  29    -3.296884 
28  30    -5.744224 
28  31    -0.084656 
28  32    1.987518 
28  33    -2.579220 
28  34    -3.771488 
28  35    -1.273279 
28  36    1.482841 
28  37    -1.070213 
28  38    -1.574582 
28  39    0.272241 
28  40    0.991653 
28  41    1.876004 
28  42    2.394605 
28  43    3.312961 
28  44    -2.677843 
28  45    -0.626030 
28  46    -1.775600 
28  47    -0.415274 
28  48    -0.696566 
28  49    -3.791592 
28  50    -5.378022 
28  51    -1.810526 
28  52    1.823024 
28  53    1.078303 
28  54    1.059052 
28  55    0.710510 
28  56    0.426079 
28  57    -8.226166 
28  58    -9.835162 
28  59    -5.574381 
28  60    -3.972514 
28  61    8.600381 
28  62    8.502627 
28  63    6.992927 
28  64    3.657551 
29  30    0.000000 
29  31    0.000000 
29  32    0.000000 
29  33    -31.000000 
29  34    -43.489094 
29  35    -27.507690 
29  36    18.379997 
29  37    14.000000 
29  38    39.715621 
29  39    -47.788755 
29  40    27.941654 
29  41    5.000000 
29  42    8.117399 
29  43    1.539605 
29  44    -3.757956 
29  45    0.000000 
29  46    -2.260918 
29  47    5.555863 
29  48    1.644289 
29  49    -9.000000 
29  50    -16.162971 
29  51    -8.080506 
29  52    6.664986 
29  53    9.739540 
29  54    9.565640 
29  55    6.417530 
29  56    3.848460 
29  57    -1.104200 
29  58    -1.320180 
29  59    -0.748250 
29  60    -0.533231 
29  61    -4.179250 
29  62    -4.131750 
29  63    -3.398130 
29  64    -1.777340 
30  31    0.000000 
30  32    0.000000 
30  33    -51.380681 
30  34    -66.069817 
30  35    -47.066077 
30  36    29.894595 
30  37    24.321501 
30  38    65.506991 
30  39    -85.605753 
30  40    51.945010 
30  41    7.360058 
30  42    11.709982 
30  43    0.205498 
30  44    -4.420164 
30  45    0.897293 
30  46    -2.461013 
30  47    7.990407 
30  48    2.768675 
30  49    -15.506320 
30  50    -23.471717 
30  51    -8.329776 
30  52    8.470650 
30  53    28.345647 
30  54    27.839531 
30  55    18.677373 
30  56    11.200459 
30  57    -11.080592 
30  58    -13.247922 
30  59    -7.508658 
30  60    -5.350949 
30  61    5.221021 
30  62    5.161677 
30  63    4.245190 
30  64    2.220382 
31  32    0.000000 
31  33    0.263527 
31  34    -5.289895 
31  35    28.444169 
31  36    -9.697509 
31  37    26.921265 
31  38    26.274673 
31  39    65.432493 
31  40    -40.223605 
31  41    5.513718 
31  42    7.446289 
31  43    8.718482 
31  44    -6.916406 
31  45    -0.972366 
31  46    -5.001585 
31  47    6.024992 
31  48    0.579633 
31  49    -3.574127 
31  50    0.364736 
31  51    -23.786548 
31  52    8.535809 
31  53    -104.846490 
31  54    -102.974445 
31  55    -69.084960 
31  56    -41.428905 
31  57    36.147720 
31  58    43.218000 
31  59    24.495135 
31  60    17.456145 
31  61    -40.574310 
31  62    -40.113150 
31  63    -32.990790 
31  64    -17.255280 
32  33    18.616185 
32  34    26.035992 
32  35    -2.941480 
32  36    -3.436961 
32  37    -63.943635 
32  38    -106.037527 
32  39    10.930805 
32  40    -19.023440 
32  41    -5.534046 
32  42    -8.483160 
32  43    -2.407504 
32  44    3.996246 
32  45    -0.394876 
32  46    5.579303 
32  47    -13.217242 
32  48    -2.068862 
32  49    3.239208 
32  50    2.136272 
32  51    14.584268 
32  52    -5.936828 
32  53    -2.151684 
32  54    -2.113267 
32  55    -1.417775 
32  56    -0.850213 
32  57    -7.814358 
32  58    -9.342802 
32  59    -5.295323 
32  60    -3.773648 
32  61    10.497580 
32  62    10.378252 
32  63    8.535532 
32  64    4.464377 
33  34    0.000000 
33  35    0.000000 
33  36    0.000000 
33  37    73.000000 
33  38    128.840195 
33  39    47.346075 
33  40    -45.338621 
33  41    -3.000000 
33  42    -1.053988 
33  43    -6.233630 
33  44    5.767407 
33  45    1.000000 
33  46    2.188240 
33  47    -1.875263 
33  48    -1.059728 
33  49    70.000000 
33  50    136.780215 
33  51    29.118495 
33  52    -29.925456 
33  53    -7.929280 
33  54    -7.787700 
33  55    -5.224720 
33  56    -3.133160 
33  57    -3.180210 
33  58    -3.802240 
33  59    -2.155040 
33  60    -1.535760 
33  61    3.502090 
33  62    3.462280 
33  63    2.847530 
33  64    1.489360 
34  35    0.000000 
34  36    0.000000 
34  37    118.012895 
34  38    179.758145 
34  39    -2.054528 
34  40    -43.030926 
34  41    -12.307966 
34  42    -17.855171 
34  43    -12.052945 
34  44    17.650047 
34  45    2.913451 
34  46    11.435685 
34  47    -8.963288 
34  48    0.260655 
34  49    138.993360 
34  50    197.914924 
34  51    112.013748 
34  52    -67.516072 
34  53    -26.108286 
34  54    -25.642095 
34  55    -17.203159 
34  56    -10.316416 
34  57    -1.222643 
34  58    -1.461788 
34  59    -0.828512 
34  60    -0.590429 
34  61    5.550188 
34  62    5.487104 
34  63    4.512834 
34  64    2.360370 
35  36    0.000000 
35  37    118.863150 
35  38    77.768835 
35  39    286.049137 
35  40    -107.384841 
35  41    34.986315 
35  42    53.729312 
35  43    5.013850 
35  44    -23.156401 
35  45    -9.044103 
35  46    -26.984107 
35  47    22.181043 
35  48    -7.047318 
35  49    50.404935 
35  50    121.268705 
35  51    -254.470230 
35  52    82.084131 
35  53    47.299770 
35  54    46.455255 
35  55    31.166520 
35  56    18.689895 
35  57    -11.414550 
35  58    -13.647165 
35  59    -7.734961 
35  60    -5.512217 
35  61    -0.829506 
35  62    -0.820077 
35  63    -0.674467 
35  64    -0.352771 
36  37    -63.616875 
36  38    -63.005021 
36  39    -97.720872 
36  40    46.183469 
36  41    -8.605222 
36  42    -13.788186 
36  43    2.941547 
36  44    1.462791 
36  45    1.584530 
36  46    8.914448 
36  47    -11.738849 
36  48    1.881139 
36  49    -36.426495 
36  50    -69.334888 
36  51    68.236993 
36  52    -20.606598 
36  53    -10.343499 
36  54    -10.158815 
36  55    -6.815487 
36  56    -4.087111 
36  57    3.649990 
36  58    4.363909 
36  59    2.473384 
36  60    1.762622 
36  61    -0.854473 
36  62    -0.844760 
36  63    -0.694768 
36  64    -0.363388 
37  38    0.000000 
37  39    0.000000 
37  40    0.000000 
37  41    1.000000 
37  42    2.978817 
37  43    -0.542659 
37  44    1.202890 
37  45    0.000000 
37  46    -2.270377 
37  47    6.826877 
37  48    2.766169 
37  49    -1.000000 
37  50    1.247542 
37  51    -0.986734 
37  52    -1.833132 
37  53    -16.264400 
37  54    -15.974000 
37  55    -10.716900 
37  56    -6.426690 
37  57    10.582100 
37  58    12.651900 
37  59    7.170860 
37  60    5.110220 
37  61    -7.912700 
37  62    -7.822760 
37  63    -6.433780 
37  64    -3.365090 
38  39    0.000000 
38  40    0.000000 
38  41    -8.075791 
38  42    -12.334703 
38  43    -0.614938 
38  44    5.779354 
38  45    1.079065 
38  46    2.760193 
38  47    -3.415381 
38  48    1.581406 
38  49    -0.460229 
38  50    0.418342 
38  51    13.032829 
38  52    -7.970325 
38  53    -54.409894 
38  54    -53.438429 
38  55    -35.851546 
38  56    -21.499390 
38  57    18.421370 
38  58    22.024486 
38  59    12.483092 
38  60    8.895899 
38  61    -12.007644 
38  62    -11.871134 
38  63    -9.763364 
38  64    -5.106577 
39  40    0.000000 
39  41    39.582900 
39  42    61.146237 
39  43    1.071619 
39  44    -13.401955 
39  45    4.386540 
39  46    -22.805183 
39  47    51.162382 
39  48    10.060509 
39  49    -5.132893 
39  50    3.111107 
39  51    -51.636249 
39  52    19.188228 
39  53    177.349200 
39  54    174.182400 
39  55    116.857650 
39  56    70.077420 
39  57    -2.715773 
39  58    -3.246968 
39  59    -1.840314 
39  60    -1.311482 
39  61    -2.820562 
39  62    -2.788506 
39  63    -2.293389 
39  64    -1.199520 
40  41    -11.030985 
40  42    -17.400245 
40  43    0.926323 
40  44    1.128373 
40  45    -2.428281 
40  46    13.436879 
40  47    -36.111206 
40  48    -5.310518 
40  49    -0.356056 
40  50    -4.339921 
40  51    13.048469 
40  52    -3.553537 
40  53    -38.609894 
40  54    -37.920538 
40  55    -25.440624 
40  56    -15.256243 
40  57    -7.429784 
40  58    -8.883009 
40  59    -5.034723 
40  60    -3.587929 
40  61    5.076234 
40  62    5.018534 
40  63    4.127460 
40  64    2.158802 
41  42    0.000000 
41  43    0.000000 
41  44    0.000000 
41  45    -9.000000 
41  46    -88.236312 
41  47    81.799030 
41  48    -5.414119 
41  49    -4.000000 
41  50    -0.971745 
41  51    -19.547850 
41  52    8.747408 
41  53    71.984600 
41  54    70.699300 
41  55    47.431700 
41  56    28.443900 
41  57    -6.969330 
41  58    -8.332490 
41  59    -4.722700 
41  60    -3.365570 
41  61    -1.847410 
41  62    -1.826410 
41  63    -1.502120 
41  64    -0.785662 
42  43    0.000000 
42  44    0.000000 
42  45    -41.529895 
42  46    -149.721964 
42  47    117.221698 
42  48    -19.095388 
42  49    -4.046156 
42  50    -0.781694 
42  51    -28.610355 
42  52    12.626656 
42  53    112.703030 
42  54    110.690910 
42  55    74.261721 
42  56    44.533302 
42  57    -3.897725 
42  58    -4.660096 
42  59    -2.641253 
42  60    -1.882258 
42  61    -2.580123 
42  62    -2.550792 
42  63    -2.097888 
42  64    -1.097269 
43  44    0.000000 
43  45    34.416688 
43  46    114.796771 
43  47    -57.312136 
43  48    27.790481 
43  49    -7.677558 
43  50    -6.938361 
43  51    -17.375290 
43  52    8.764787 
43  53    4.620431 
43  54    4.537932 
43  55    3.044475 
43  56    1.825708 
43  57    -35.965335 
43  58    -42.999915 
43  59    -24.371550 
43  60    -17.368050 
43  61    -1.938856 
43  62    -1.916817 
43  63    -1.576480 
43  64    -0.824551 
44  45    -5.463273 
44  46    -86.922041 
44  47    67.973653 
44  48    -6.957502 
44  49    8.192625 
44  50    6.747618 
44  51    25.136385 
44  52    -11.541435 
44  53    -8.226567 
44  54    -8.079688 
44  55    -5.420606 
44  56    -3.250632 
44  57    19.378867 
44  58    23.169274 
44  59    13.131888 
44  60    9.358283 
44  61    1.397289 
44  62    1.381406 
44  63    1.136129 
44  64    0.594235 
45  46    0.000000 
45  47    0.000000 
45  48    0.000000 
45  49    0.000000 
45  50    -2.648266 
45  51    9.477353 
45  52    -4.130956 
45  53    -3.349720 
45  54    -3.289910 
45  55    -2.207180 
45  56    -1.323600 
45  57    7.477980 
45  58    8.940630 
45  59    5.067380 
45  60    3.611200 
45  61    -0.051026 
45  62    -0.050446 
45  63    -0.041489 
45  64    -0.021700 
46  47    0.000000 
46  48    0.000000 
46  49    2.255496 
46  50    -0.258967 
46  51    16.794316 
46  52    -7.761381 
46  53    -29.877959 
46  54    -29.344454 
46  55    -19.687058 
46  56    -11.805881 
46  57    6.975798 
46  58    8.340229 
46  59    4.727082 
46  60    3.368695 
46  61    1.784686 
46  62    1.764400 
46  63    1.451121 
46  64    0.758986 
47  48    0.000000 
47  49    -4.138123 
47  50    -6.369962 
47  51    -3.598621 
47  52    2.375403 
47  53    36.254107 
47  54    35.606765 
47  55    23.888417 
47  56    14.325347 
47  57    8.984412 
47  58    10.741720 
47  59    6.088196 
47  60    4.338679 
47  61    -3.708633 
47  62    -3.666475 
47  63    -3.015469 
47  64    -1.577202 
48  49    -0.925154 
48  50    -2.523033 
48  51    4.031567 
48  52    -3.011778 
48  53    -0.319965 
48  54    -0.314252 
48  55    -0.210831 
48  56    -0.126430 
48  57    8.311463 
48  58    9.937144 
48  59    5.632181 
48  60    4.013700 
48  61    -1.175362 
48  62    -1.162003 
48  63    -0.955682 
48  64    -0.499854 
49  50    0.000000 
49  51    0.000000 
49  52    0.000000 
49  53    -4.052440 
49  54    -3.980080 
49  55    -2.670210 
49  56    -1.601270 
49  57    4.428820 
49  58    5.295070 
49  59    3.001150 
49  60    2.138730 
49  61    2.501520 
49  62    2.473090 
49  63    2.033970 
49  64    1.063840 
50  51    0.000000 
50  52    0.000000 
50  53    -1.052146 
50  54    -1.033362 
50  55    -0.693275 
50  56    -0.415743 
50  57    1.963397 
50  58    2.347430 
50  59    1.330477 
50  60    0.948146 
50  61    3.091362 
50  62    3.056225 
50  63    2.513570 
50  64    1.314685 
51  52    0.000000 
51  53    -27.223035 
51  54    -26.736990 
51  55    -17.937675 
51  56    -10.756830 
51  57    15.913170 
51  58    19.025685 
51  59    10.783395 
51  60    7.684656 
51  61    3.915891 
51  62    3.871382 
51  63    3.183999 
51  64    1.665342 
52  53    11.429510 
52  54    11.225491 
52  55    7.531075 
52  56    4.516237 
52  57    -7.498297 
52  58    -8.964923 
52  59    -5.081145 
52  60    -3.621013 
52  61    -2.277813 
52  62    -2.251920 
52  63    -1.852076 
52  64    -0.968703 
53  54    0.000000 
53  55    0.000000 
53  56    0.000000 
53  57    -18.010000 
53  58    -21.532700 
53  59    -12.204300 
53  60    -8.697240 
53  61    13.050300 
53  62    12.902000 
53  63    10.611100 
53  64    5.550000 
54  55    0.000000 
54  56    0.000000 
54  57    -17.688400 
54  58    -21.148200 
54  59    -11.986400 
54  60    -8.541950 
54  61    12.817300 
54  62    12.671600 
54  63    10.421700 
54  64    5.450900 
55  56    0.000000 
55  57    -11.867100 
55  58    -14.188200 
55  59    -8.041600 
55  60    -5.730740 
55  61    8.599040 
55  62    8.501300 
55  63    6.991840 
55  64    3.656980 
56  57    -7.116440 
56  58    -8.508380 
56  59    -4.822380 
56  60    -3.436610 
56  61    5.156670 
56  62    5.098060 
56  63    4.192870 
56  64    2.193020 
57  58    0.000000 
57  59    0.000000 
57  60    0.000000 
57  61    -22.632600 
57  62    -22.375300 
57  63    -18.402500 
57  64    -9.625130 
58  59    0.000000 
58  60    0.000000 
58  61    -27.059400 
58  62    -26.751800 
58  63    -22.001900 
58  64    -11.507800 
59  60    0.000000 
59  61    -15.336800 
59  62    -15.162400 
59  63    -12.470300 
59  64    -6.522370 
60  61    -10.929500 
60  62    -10.805300 
60  63    -8.886770 
60  64    -4.648090 
61  62    0.000000 
61  63    0.000000 
61  64    0.000000 
62  63    0.000000 
62  64    0.000000 
63  64    0.000000 
