# Supplementary material for: Origin of non-conservative circular dichroism of the CP29 antenna complex of photosystem II
Source: Royal Society of Chemistry journal article supplement (doi:10.1039/c6cp08778g), 2017-01-01
Supplement: c6cp08778g2.pdf [file c6cp08778g2.pdf]

## SUPPLEMENTARY INFORMATION

### Origin of Non-Conservative Circular Dichroism in the CP29 Antenna Complex of Photosystem II

Dominik Lindorfer\*, Frank Müh and Thomas Renger

Institute of Theoretical Physics, Department of Theoretical Biophysics, Johannes Kepler University  
Linz, Altenbergerstr. 69, 4040 Linz, Austria

E-mail: dominik.lindorfer@jku.at

#### 1 Details of line-shape functions

The line-shape function in eq. 17 and 18 of the main text is given as

$$D_{M_d}(\omega) = \frac{1}{2\pi} \int_{-\infty}^{\infty} dt e^{i(\omega - \tilde{\omega}_{M_d0})t} e^{G_{M_d}(t) - G_{M_d}(0)} e^{-|t|/\tau_{M_d}} \quad (1)$$

Here, the transition frequency from the ground state to the  $M$ th exciton state in domain  $d$  is denoted as  $\tilde{\omega}_{M_d0}$ , which is shifted due to exciton-vibrational coupling from the exciton transition frequency  $\omega_{M_d0} = E_{M_d}/\hbar$  by

$$\tilde{\omega}_{M_d0} = \omega_{M_d0} - \gamma_{M_d M_d} \frac{E_\lambda}{\hbar} + \sum_{K_d, M_d} \gamma_{M_d K_d} \tilde{C}^{(Im)}(\omega_{M_d K_d}) \quad (2)$$

containing the reorganization energy  $E_\lambda$  in eq. 8 of the main text and the half-sided Fourier transform of the correlation function of site energy fluctuations  $\tilde{C}(\omega)$ . The real and imaginary parts of the latter are given as

$$\tilde{C}^{(Re)}(\omega) = 2\pi\omega \{ (1 + n(\omega))J(\omega) + n(-\omega)J(-\omega) \} \quad (3)$$

and

$$\tilde{C}^{(Im)}(\bar{\omega}) = \frac{1}{\pi} \mathcal{P} \int_{-\infty}^{\infty} d\bar{\omega} \frac{\tilde{C}^{(Re)}(\bar{\omega})}{\bar{\omega} - \omega} \quad (4)$$

respectively, where  $\mathcal{P}$  denotes the principal part of the integral. Please note that  $\tilde{\omega}_{M_d0}$  in eq. 2 is the transition frequency of the isolated exciton domain  $d$ , since the diagonal elements of the perturbation operator  $V_{Q_y,he}$  in eq. 2 of the main text are zero and hence there is no first-order contribution to the transition energies. Lifetime broadening due to exciton relaxation is described through the inverse dephasing time  $\tau_{M_d}^{-1}$

$$\tau_{M_d}^{-1} = 2 \sum_{K_d} \gamma_{M_d K_d} \tilde{C}^{(Re)}(\omega_{M_d K_d}) \quad (5)$$

and  $\omega_{M_d K_d}$  is the transition frequency from exciton state  $|M_d\rangle$  to  $|K_d\rangle$  of domain  $d$ . The function  $\gamma_{M_d K_d}$  is an electronic overlap factor between exciton states  $|M_d^{(0)}\rangle$  and  $|K_d^{(0)}\rangle$

$$\gamma_{M_d K_d} = \sum_{m_d} \left( c_{m_d}^{(M_d)} \right)^2 \left( c_{m_d}^{(K_d)} \right)^2 \quad (6)$$

The time-dependent function  $G_{M_d}(t) = \gamma_{M_d M_d} G(t)$  in eq. 1 describes the excitation of the vibrational sidebands, where  $G(t)$  is given as

$$G(t) = \int_0^\infty d\omega \{ (1 + n(\omega)) J(\omega) e^{-i\omega t} + n(\omega) J(\omega) e^{i\omega t} \} \quad (7)$$

and contains the spectral density  $J(\omega)$  and the Bose-Einstein distribution function  $n(\omega)$

$$n(\omega) = \frac{1}{e^{\hbar\omega/k_B T} - 1} \quad (8)$$

that describes the mean number of excited vibrational quanta at temperature  $T$ . The shape of the spectral density has been estimated<sup>1</sup> from fluorescence line narrowing spectra of B777 complexes

$$J(\omega) = \frac{S_0}{s_1 + s_2} \sum_{i=1,2} \frac{s_i}{7! 2\omega_i^4} \omega_i^3 e^{-(\omega/\omega_i)^{1/2}} \quad (9)$$

with  $s_1 = 0.5$ ,  $s_2 = 0.8$ ,  $\hbar\omega_1 = 0.069$  meV and  $\hbar\omega_2 = 0.24$  meV. The Huang-Rhys factor  $S_0 = 0.5$  was obtained from the temperature-dependence of the absorption spectrum<sup>2</sup>.

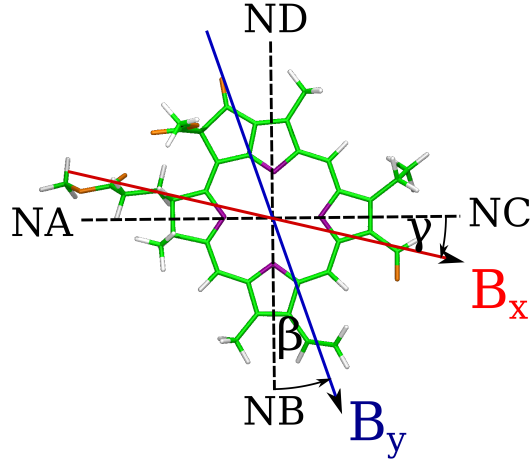

Figure S1: Illustration of the  $N_B - N_D$  and  $N_A - N_C$  axis of Chl. The transition dipole moments of  $B_x$  and  $B_y$  for extended dipole couplings are rotated by the angles  $\beta$  and  $\gamma$ .

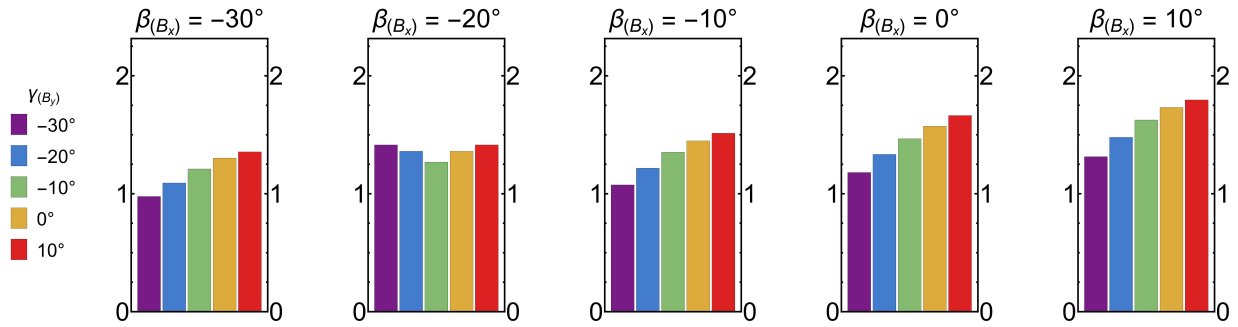

Figure S2: Comparison of the ratios  $A_-/A_+$  of negative to positive area of the excitonic CD spectrum. Excitonic couplings are calculated using an extended dipole approximation for the  $B_x$  and  $B_y$  transitions which are rotated by the angles  $\beta$  and  $\gamma$  with respect to the  $N_B - N_D$  and  $N_A - N_C$  axes, respectively. All other transitions were described with atomic transition charges obtained from HF/CIS calculations.

Table S1: Transition dipole directions obtained with different QC methods. The angle  $\beta$  for Chl  $a$  and Chl  $b$  is with respect to the  $N_B - N_D$  axis as defined in Fig. S1. For carotenoids, the angle  $\delta$  is given with respect to the direction of the polyene chain along the  $C7 - C27$  axis. All angles given in degree.

| Chl $a$     |                  |                  |                  |                  |
|-------------|------------------|------------------|------------------|------------------|
|             | HF-CIS           | CAM-B3LYP        | B3LYP            | BHHLYP           |
|             | $\beta[^\circ]$  | $\beta[^\circ]$  | $\beta[^\circ]$  | $\beta[^\circ]$  |
| $Q_y$       | 6.0              | 5.2              | 6.4              | 5.1              |
| $B_x$       | 77.5             | 88.7             | -8.8             | 88.8             |
| $B_y$       | -7.8             | 7.3              | 18.5             | 6.7              |
| $N_{x+xy}$  | 54.6             | 61.9             | 73.2             | 57.1             |
| Chl $b$     |                  |                  |                  |                  |
|             | HF-CIS           | CAM-B3LYP        | B3LYP            | BHHLYP           |
|             | $\beta[^\circ]$  | $\beta[^\circ]$  | $\beta[^\circ]$  | $\beta[^\circ]$  |
| $Q_y$       | 14.1             | 10.2             | 9.1              | 9.1              |
| $B_x$       | 76.2             | 93.9             | 72.7             | 94.8             |
| $B_y$       | -11.9            | 24.4             | -29.7            | 26.8             |
| $N_{x+xy}$  | 46.4             | -69.0            | 79.1             | -63.1            |
| Carotenoids |                  |                  |                  |                  |
|             | HF-CIS           | CAM-B3LYP        | B3LYP            | BHHLYP           |
|             | $\delta[^\circ]$ | $\delta[^\circ]$ | $\delta[^\circ]$ | $\delta[^\circ]$ |
| Lut         | 7.9              | 4.1              | 2.3              | 4.5              |
| Neo         | 6.8              | 4.4              | 2.9              | 4.5              |
| Vio         | 8.79             | 4.8              | 3.55             | 5.63             |

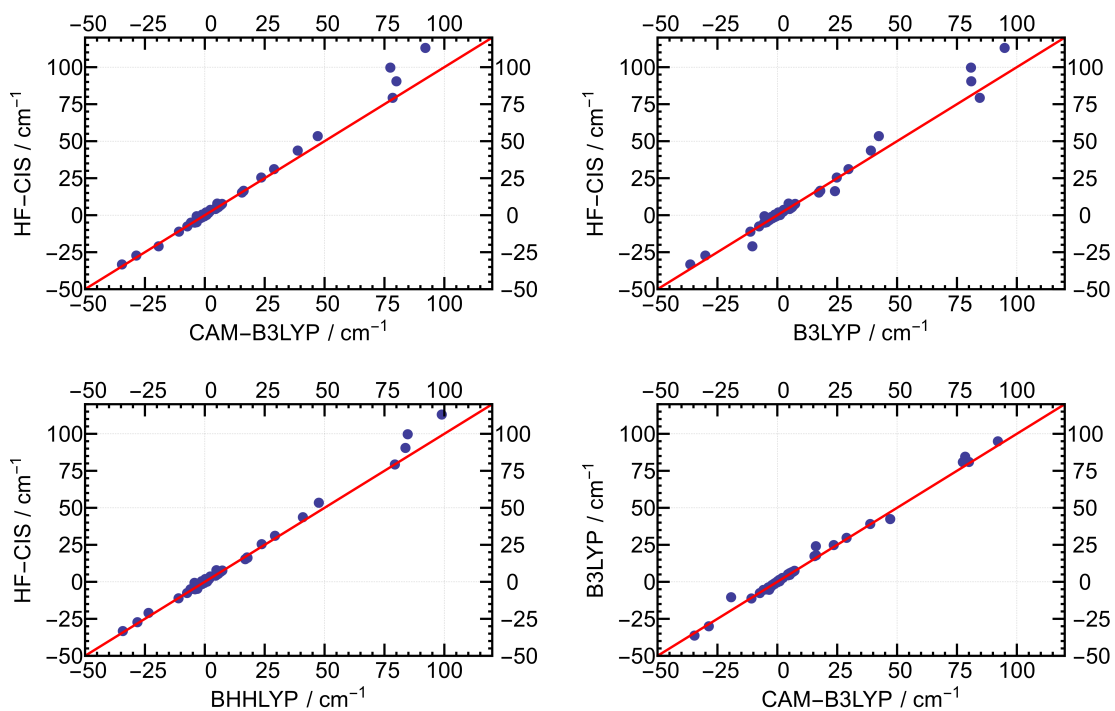

Figure S3: Comparison of Poisson-TrESP excitonic couplings of  $Q_y$  transitions obtained from TD-DFT calculations using B3LYP, BHHLYP and the range separated CAM-B3LYP XC-functionals and the wavefunction based HF-CIS. The red lines represent perfect correlation.

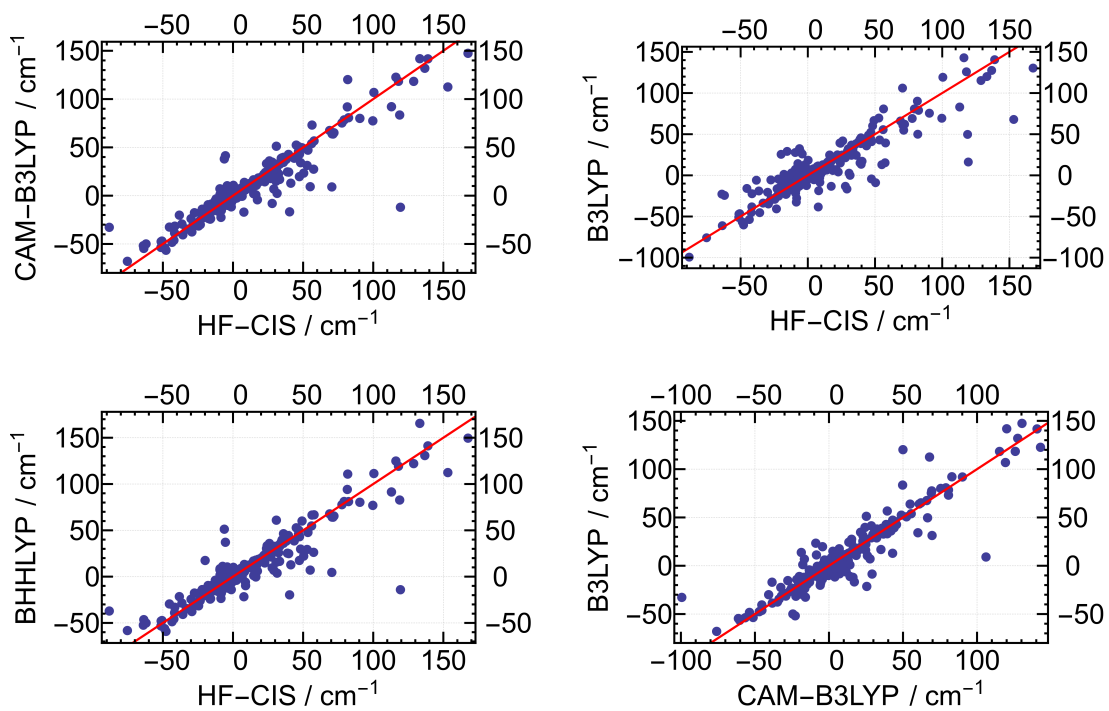

Figure S4: Comparison of Poisson-TrESP excitonic couplings between all pigments in CP29 obtained from TD-DFT calculations using B3LYP, BHHLYP as well as the range separated CAM-B3LYP XC-functionals with those obtained from the wavefunction based HF-CIS method. The red lines represent a perfect correlation.

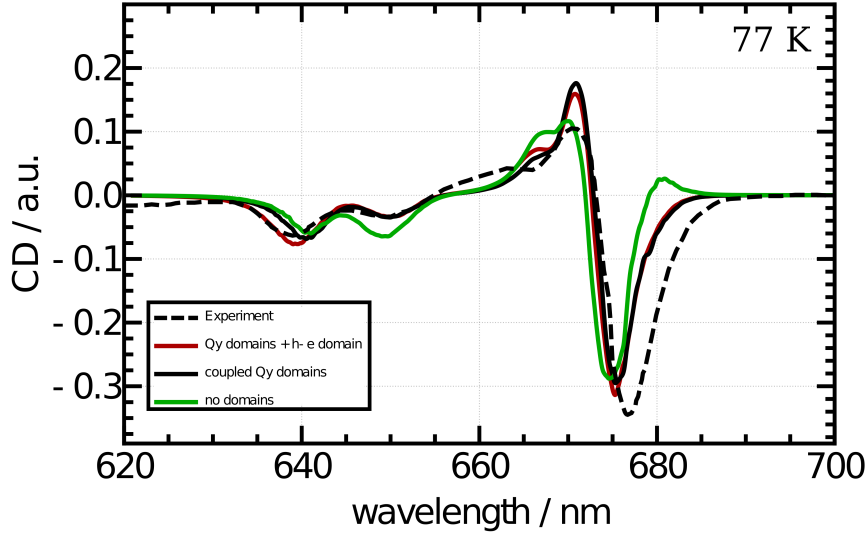

Figure S5: The red line shows the spectrum which is obtained by using domains for both  $Q_y$  and high-energy transitions that are coupled in first order perturbation theory, as in Fig. 9 of the main text. The spectrum in black is obtained by diagonalizing an exciton Hamiltonian that contains the coupling between  $Q_y$  domains and high-energy domains. The green line shows the spectrum that is obtained when no domains are introduced and thus one large exciton matrix is diagonalized. The dashed spectrum is the experiment<sup>3</sup> shown for comparison.

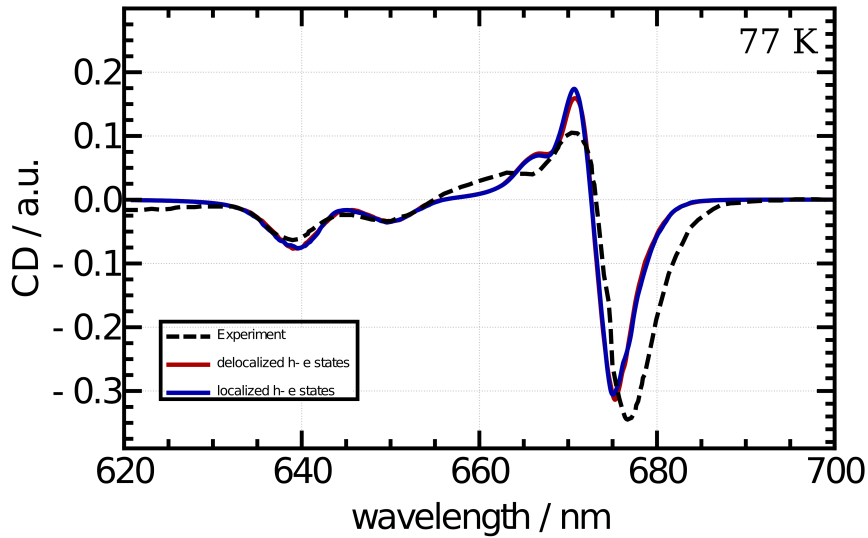

Figure S6: Comparison of spectra that are calculated by using domains for both  $Q_y$  and high-energy transitions to the experiment<sup>3</sup>. The red line is obtained when allowing delocalization among high-energy transitions, as in Fig. 9 of the main text. The blue spectrum is obtained when all excitonic couplings between high-energy transitions are set to zero.

## References

- [1] T. Renger and R. A. Marcus, *J. Chem. Phys.*, 2002, **116**, 9997–10019.
- [2] F. Müh, D. Lindorfer, M. Schmidt am Busch and T. Renger, *Phys. Chem. Chem. Phys.*, 2014, **16**, 11848–11863.
- [3] A. Pascal, C. Gradinaru, U. Wacker, E. Peterman, F. Calkoen, K.-D. Irrgang, P. Horton, G. Renger, R. van Grondelle, B. Robert and H. van Amerongen, *Eur. J. Biochem.*, 1999, **262**, 817–823.
